# Supplementary material
Source: HighWire-hosted journal article supplement (https://jcp.bmjjournals.com/content/suppl/2006/05/25/59.6.624)

Supplementary figure 1

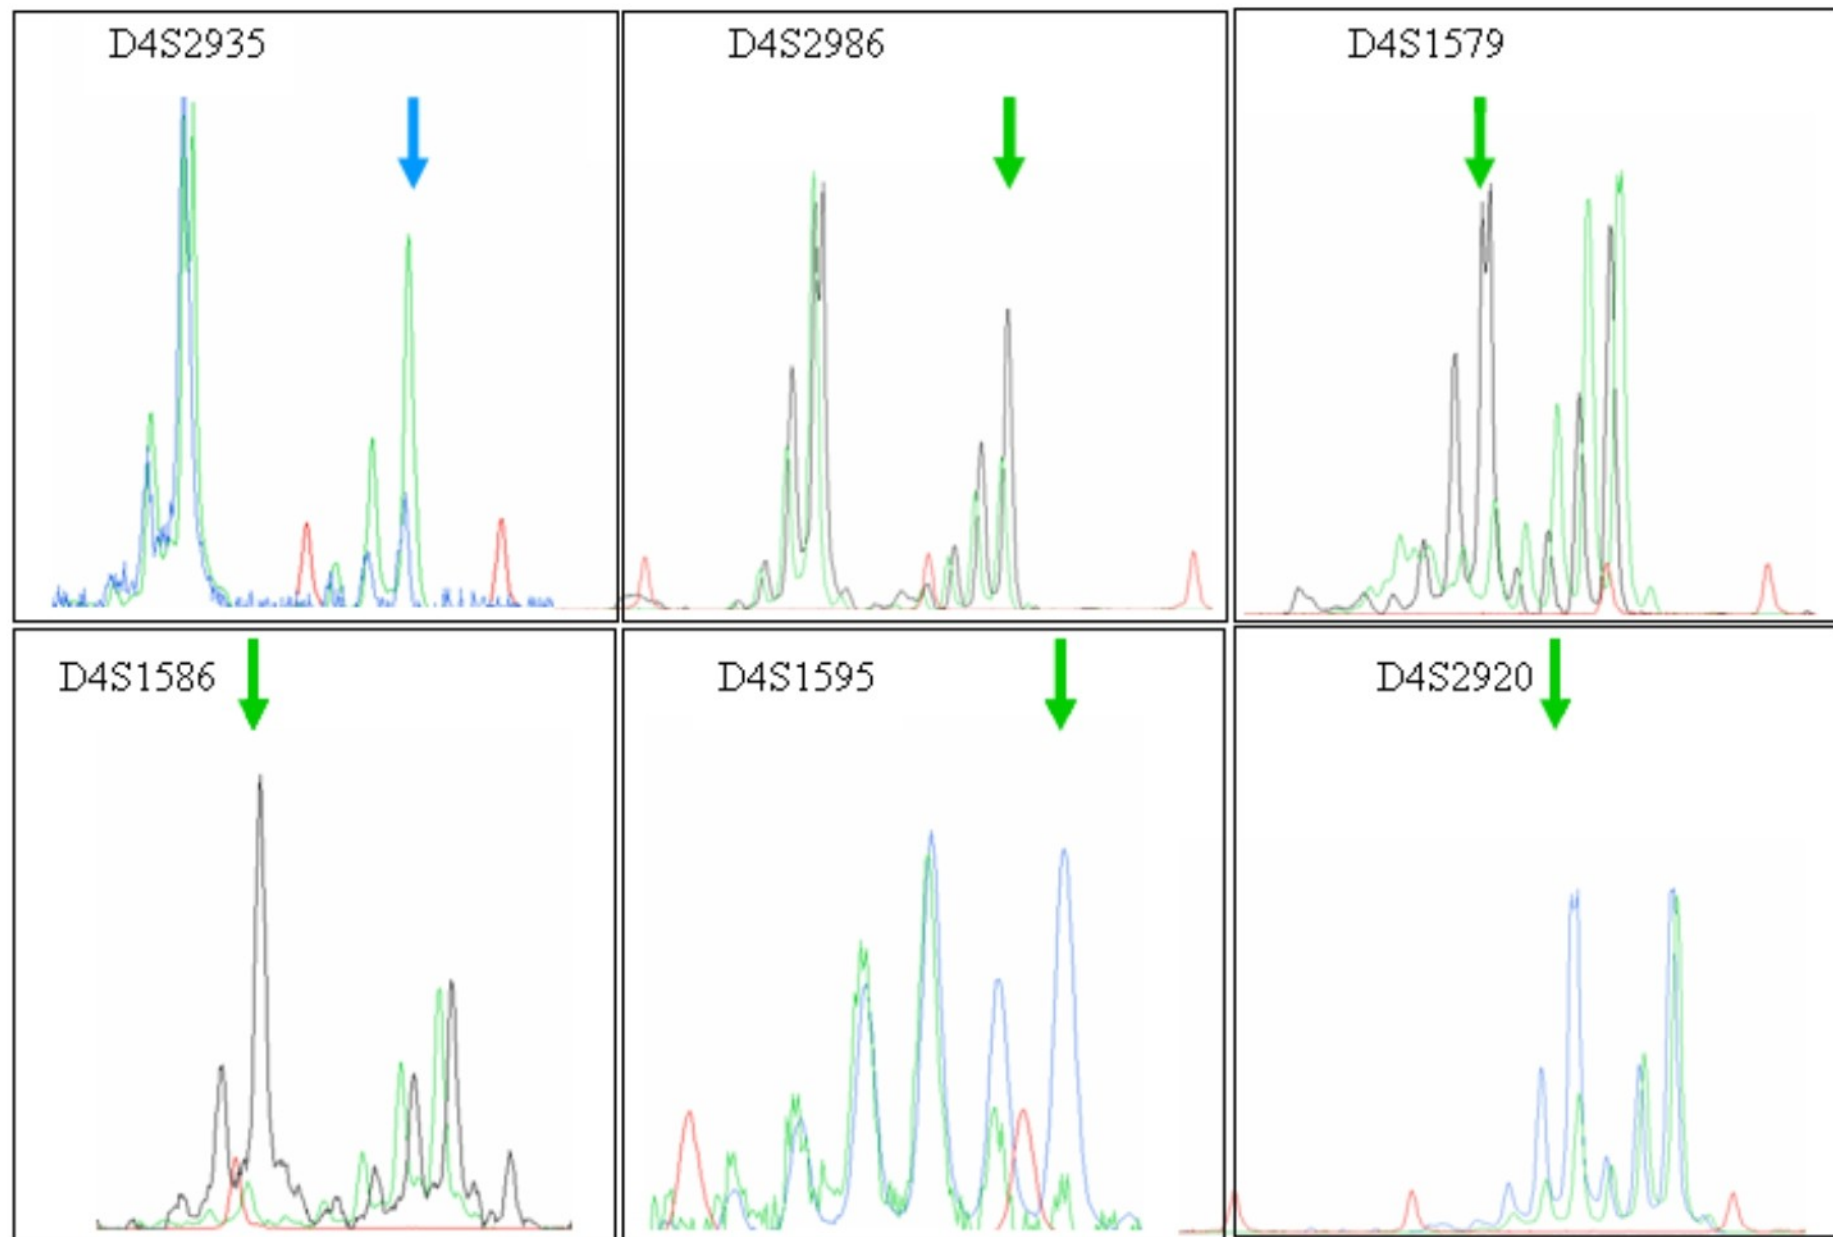

Supplementary figure 2

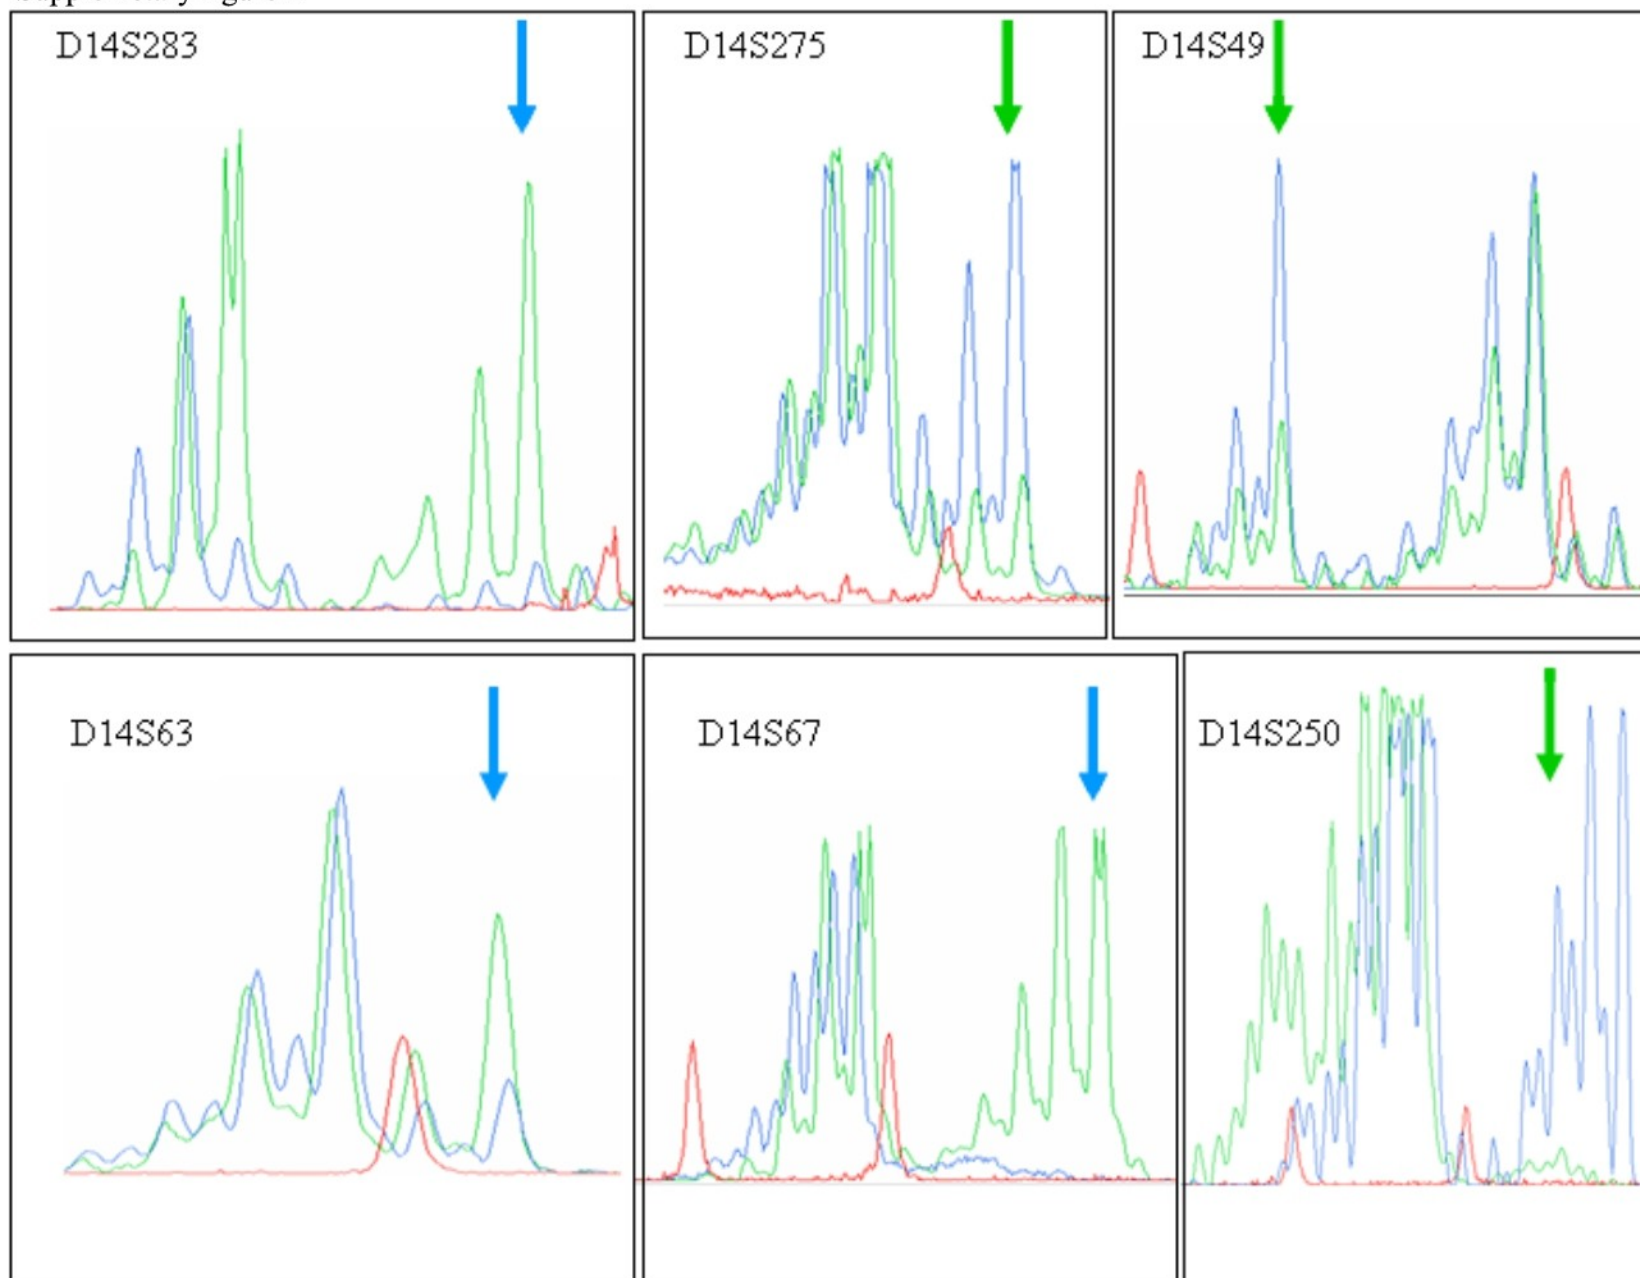

Supplement: 596624figs.pdf [file 596624figs.pdf]
